# Supplementary material for: Imidazole ionic liquid functionalized ZIF-67 molecularly imprinted solid-phase extraction coupled with high performance liquid chromatography for analysis of bisphenol A
Source: Royal Society of Chemistry journal article supplement (doi:10.1039/d2ay00359g), 2022-01-01
Supplement: d2ay00359g1.pdf [file d2ay00359g1.pdf]

## Supplementary material

**Imidazole ionic liquid functionalized ZIF-67 molecularly imprinted solid-phase  
extraction coupled with high performance liquid chromatography for analysis of  
bisphenol A**

Shuyu Wan, Ouwen Xu, Hanyang Song, Jing Yang, Xiashi Zhu\*

College of Chemistry and Chemical Engineering, College of Guangling, Yangzhou  
University, Yangzhou, 225002, China

\* Corresponding author:

Tel/Fax:+86-514-87975244

E-mail address: xszhu@yzu.edu.cn

## Figures and Tables

**Fig. S1.** The structure of BPA.

**Fig. S2.** The preparation process of ZIF-67@[Bmim][Br]@MIP.

**Fig. S3.** Repeat utilization.

**Fig. S4.** (a) Pseudo-first-order and (b) Pseudo-second-order adsorption kinetic model of BPA; (c) Langmuir and (d) Freundlich adsorption isotherm of ZIF-67@[Bmim][Br]@MIP composite to BPA.

**Fig. S5.** FTIR spectra of ZIF-67@[Bmim][Br]@MIP after extraction.

**Table S1.** The surface area and porosity of ZIF-67, ZIF-67@[Bmim][Br], ZIF-67@[Bmim][Br]@MIP and ZIF-67@[Bmim][Br]@NIP.

**Table S2.** Effect of interfering substances on extraction efficiency.

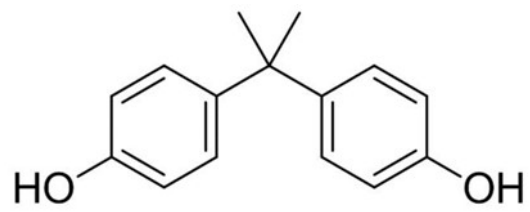

**Fig. S1.** The structure of BPA.

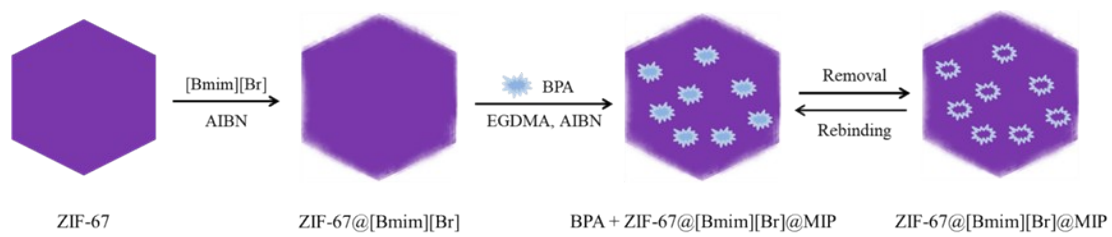

**Fig. S2.** The preparation process of ZIF-67@[Bmim][Br]@MIP.

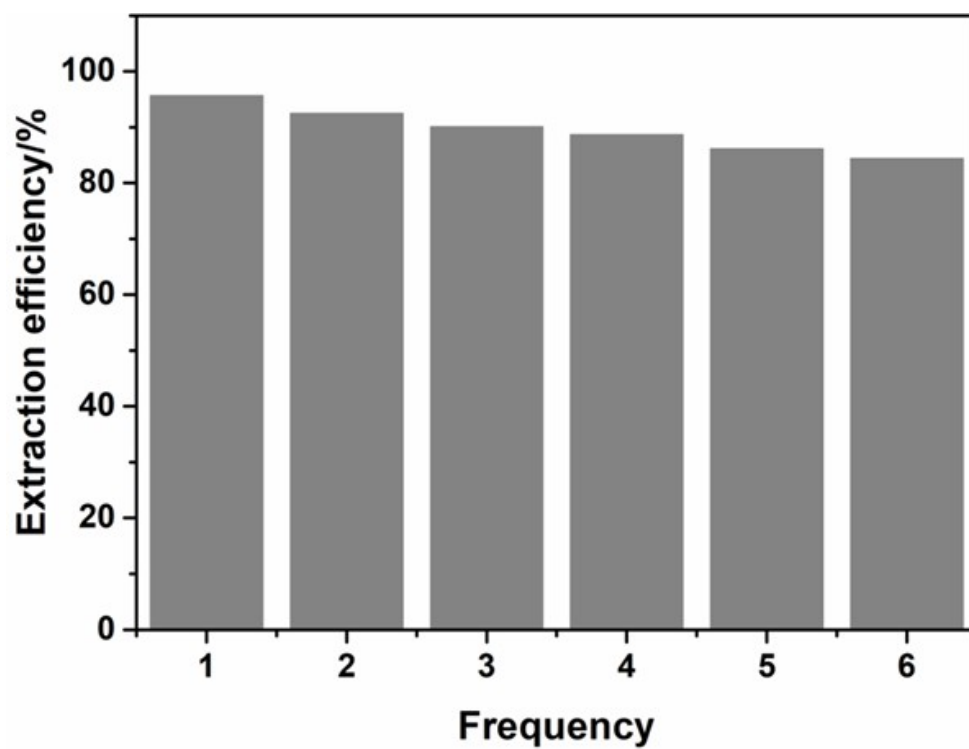

**Fig. S3.** Repeat utilization.

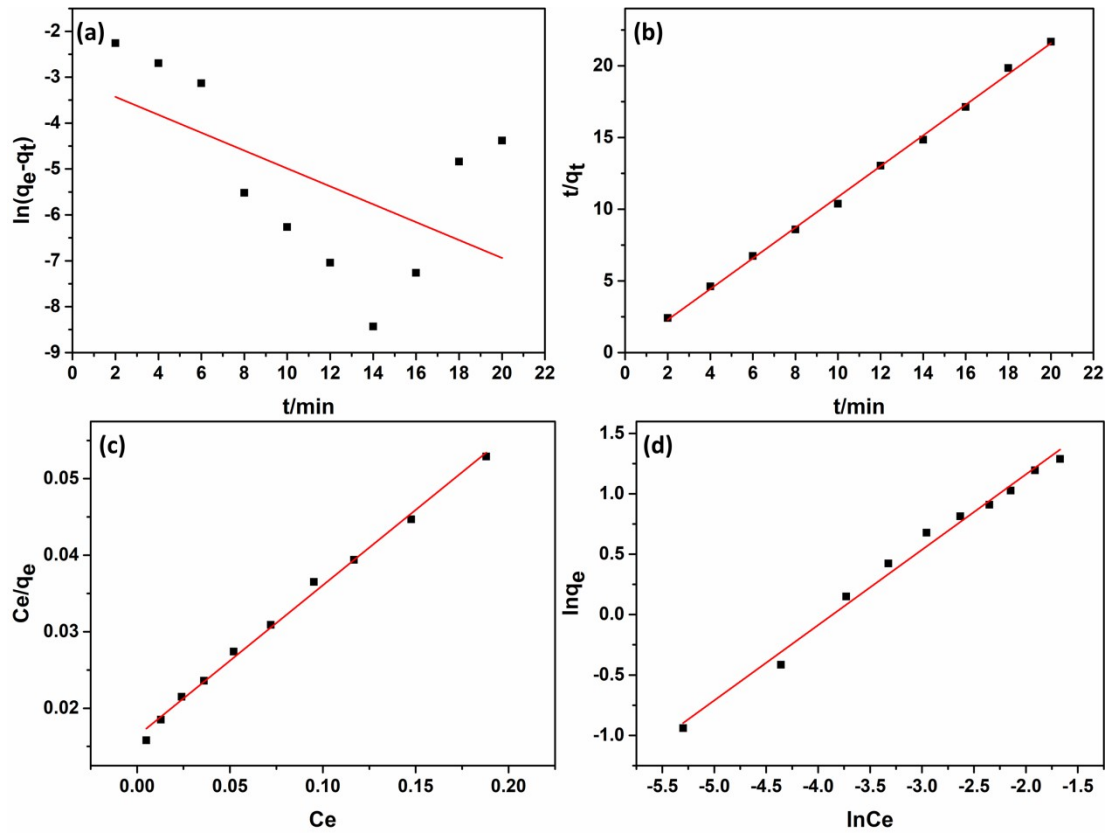

**Fig. S4.** (a) Pseudo-first-order and (b) Pseudo-second-order adsorption kinetic model of BPA; (c) Langmuir and (d) Freundlich adsorption isotherm of ZIF-67@[Bmim][Br]@MIP composite to BPA.

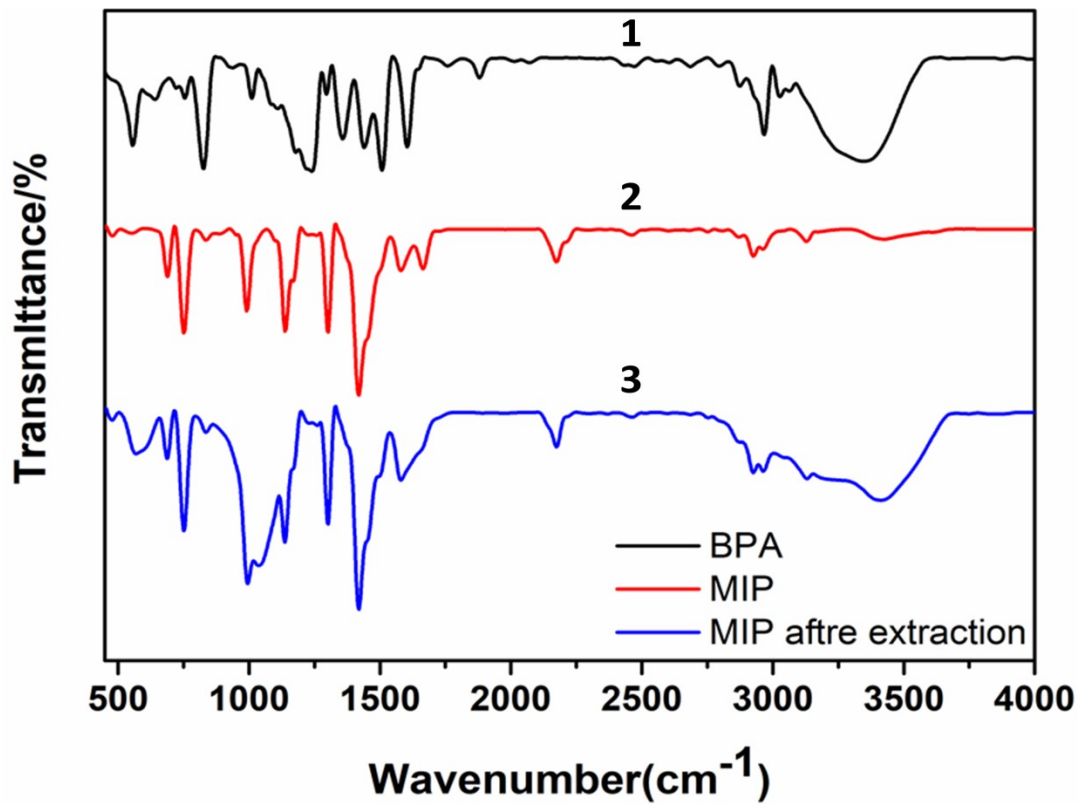

Fig. S5. FTIR spectra of ZIF-67@[Bmim][Br]@MIP after extraction.

**Table S1.** The surface area and porosity of ZIF-67, ZIF-67@[Bmim][Br], ZIF-67@[Bmim][Br]@MIP and ZIF-67@[Bmim][Br]@NIP.

| Sample                | $S_{\text{BET}}/(\text{m}^2 \text{g}^{-1})$ | $V_{\text{pore}}/(\text{cm}^3 \text{g}^{-1})$ |
|-----------------------|---------------------------------------------|-----------------------------------------------|
| ZIF-67                | 1262.87                                     | 0.7051                                        |
| ZIF-67@[Bmim][Br]     | 1115.69                                     | 0.6500                                        |
| ZIF-67@[Bmim][Br]@MIP | 2019.76                                     | 1.3283                                        |
| ZIF-67@[Bmim][Br]@NIP | 1049.26                                     | 0.6548                                        |



**Table S2.** Effect of interfering substances on extraction efficiency.

| Tested substances  | Tested substances to analyte ratio(w/w) | SC    |
|--------------------|-----------------------------------------|-------|
| BPAF               | 500                                     | 38.16 |
| Phenol             | 300                                     | 20.15 |
| 2-Naphthol         | 300                                     | 16.88 |
| $\beta$ -Estradiol | 300                                     | 22.93 |
